# Supplementary material
Source: PubMed Central journal article supplement (PMC2723177)
Supplement: NIHMS109856-supplement-1.pdf [file NIHMS109856-supplement-1.pdf]

## Supplementary Information Titles

*Please list each supplementary item and its title or caption, in the order shown below.*

**Note that we do NOT copy edit or otherwise change supplementary information, and minor (nonfactual) errors in these documents cannot be corrected after publication.**

Please submit document(s) exactly as you want them to appear, with all text, images, legends and references in the desired order, and check carefully for errors.

|                                 |
|---------------------------------|
| <b>Journal:</b> Nature Medicine |
|---------------------------------|

|                       |                                                                                                                            |
|-----------------------|----------------------------------------------------------------------------------------------------------------------------|
| Article Title:        | "Vector-mediated gene transfer engenders long-lived neutralizing activity and protection against SIV infection in monkeys" |
| Corresponding Author: | Philip R. Johnson                                                                                                          |
|                       |                                                                                                                            |

| Supplementary Item & Number<br>(add rows as necessary) | Title or Caption                                   |
|--------------------------------------------------------|----------------------------------------------------|
| Supplementary Figure 1                                 | Antibody responses to SIV Gag after SIV challenge. |
